# Supplementary material for: Preparation and antibacterial performance of a conjugated microporous polymer nanosheet-based membrane
Source: Royal Society of Chemistry journal article supplement (doi:10.1039/d4py00616j), 2024-01-01
Supplement: d4py00616j1.pdf [file d4py00616j1.pdf]

## Supporting Information

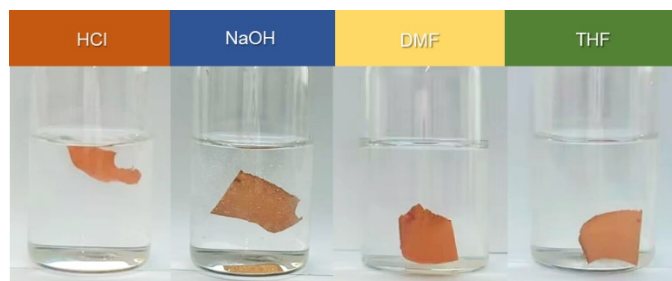

**Fig. S1** Snapshots of 2DCMP1 in different organic solvents.

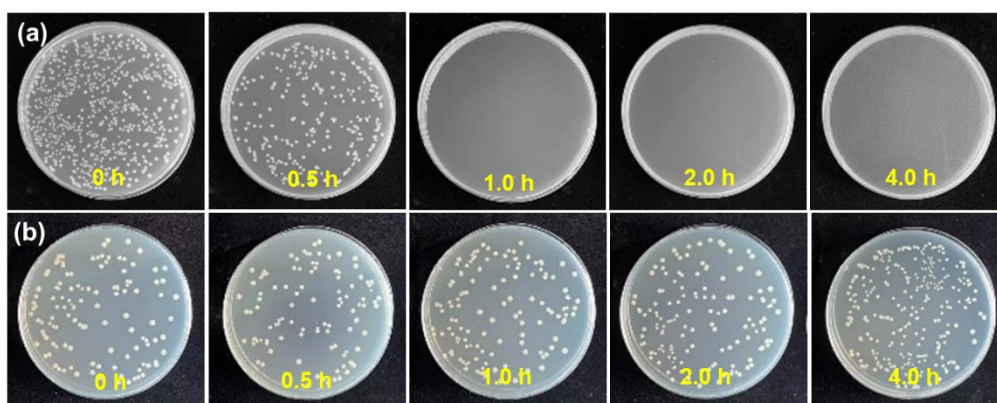

**Fig. S2** Photos of *E. coli* colony culture on agar plate after treatment with (a) TCMP and (b) T-CMP with concentration of  $1000 \mu\text{g mL}^{-1}$  for bacteria suspension of  $10^5 \text{CFU mL}^{-1}$ .
